# Supplementary material for: COVID-19 Pandemic and Helsinki University Hospital Personnel Psychological Well-Being: Six-Month Follow-Up Results
Source: MDPI journal article supplement (doi:10.3390/ijerph18052524), 2021-03-04
Supplement: s1 [file s1]

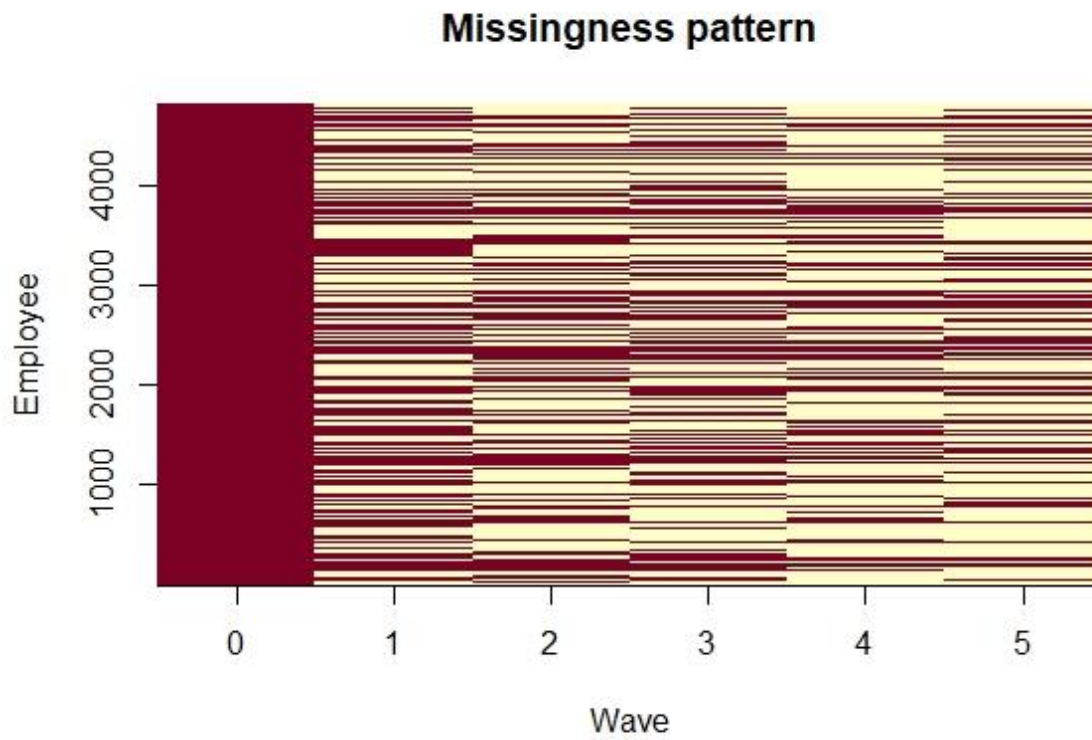

Figure S1. presents the missing data pattern in each survey wave (0-5).

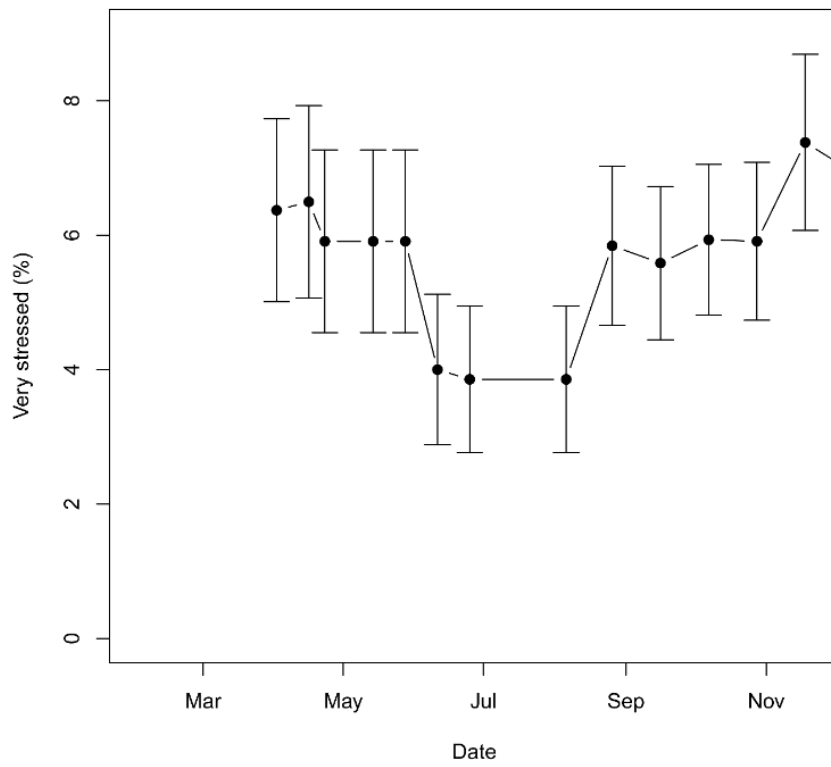

Figure S2. presents Finnish general population self-reported distress at the time of the study.
